# Supplementary material for: Genetic subgroup of small ruminant lentiviruses that infects sheep homozygous for TMEM154 frameshift deletion mutation A4Δ53
Source: Vet Res. 2015 Mar 5;46:22. doi: 10.1186/s13567-015-0162-7 (PMC4349320; doi:10.1186/s13567-015-0162-7)
Supplement: Additional file 1: — gag sequences used for phylogenetic trees of Figures 1 and 2 . Table containing the following information for the gag sequences used to construct the phylogenetic trees of Figures 1 and 2; GenBank accession number, genetic subgroup affiliation, phylotype, production in this study, country of origin. [file 13567_2015_162_MOESM1_ESM.xlsx]

## Sheet: Sheet1
gag sequences used for phylogenetic trees of Figures 1 and 2
GenBank file	Genetic Subgroupa	Phylotypeb	Produced in This Study	Country of Origin
KF012617	Subgroup #1	15	No	USA
KF012289	Subgroup #1	16	No	USA
KF012251	Subgroup #1	17	No	USA
KF012206	Subgroup #1	18	No	USA
KF012611	Subgroup #1	19	No	USA
KF012091	Subgroup #1	20	No	USA
KF012035	Subgroup #1	21	No	USA
KF012252	Subgroup #2	1	No	USA
KF012110	Subgroup #2	2	No	USA
KF012369	Subgroup #2	3	No	USA
KF012164	Subgroup #2	4	No	USA
KF012059	Subgroup #2	5	No	USA
KF012381	Subgroup #2	6	No	USA
KF012294	Subgroup #2	7	No	USA
KF012049	Subgroup #2	8	No	USA
KF012221	Subgroup #2	9	No	USA
GQ255430	Subgroup #3	not assigned	No	USA
GQ255423	Subgroup #3	not assigned	No	USA
GQ255414	Subgroup #3	not assigned	No	USA
GQ255401	Subgroup #3	not assigned	No	USA
GQ255402	Subgroup #3	not assigned	No	USA
GQ255399	Subgroup #3	not assigned	No	USA
GQ255398	Subgroup #3	not assigned	No	USA
KP120540	Subgroup #4	not assigned	Yes	USA
KP120541	Subgroup #4	not assigned	Yes	USA
KP120542	Subgroup #4	not assigned	Yes	USA
KP120543	Subgroup #4	not assigned	Yes	USA
KP120544	Subgroup #4	not assigned	Yes	USA
KP120545	Subgroup #4	not assigned	Yes	USA
KP120546	Subgroup #4	not assigned	Yes	USA
KP120547	Subgroup #4	not assigned	Yes	USA
KP120548	Subgroup #4	not assigned	Yes	USA
KP120549	Subgroup #4	not assigned	Yes	USA
KP120550	Subgroup #4	not assigned	Yes	USA
KP120551	Subgroup #4	not assigned	Yes	USA
KP120552	Subgroup #4	not assigned	Yes	USA
KP120553	Subgroup #4	not assigned	Yes	USA
KP120554	Subgroup #4	not assigned	Yes	USA
KP120555	Subgroup #4	not assigned	Yes	USA
KP120539	not assigned	not assigned	Yes	USA
GQ255435	unknown	not assigned	No	USA
AY101611	A2	not assigned	No	USA
HQ158132	A2	not assigned	No	Canada
HQ158133	A2	not assigned	No	Canada
HQ158134	A2	not assigned	No	Canada
HQ158135	A2	not assigned	No	Canada
HQ158128	B1	not assigned	No	Canada
HQ158129	B1	not assigned	No	Canada
HQ158130	B1	not assigned	No	Canada
HQ158131	B1	not assigned	No	Canada
KC155695	A2	not assigned	No	Canada
KC155696	A2	not assigned	No	Canada
KC155772	A2	not assigned	No	Canada
KC155812	A2	not assigned	No	Canada
KC155777	A2	not assigned	No	Canada
KC155775	A2	not assigned	No	Canada
S51392	A1	not assigned	No	Britain
GQ996380	unknown	not assigned	No	China
M10608	A1	not assigned	No	Iceland
EU010126	B2	not assigned	No	Italy
JF502417	B3	not assigned	No	Italy
GQ381130	E2	not assigned	No	Italy
HM210570	unknown	not assigned	No	Mexico
AF322109	C	not assigned	No	Norway
AF479638	unknown	not assigned	No	Portugal
M31646	A1	not assigned	No	South Africa
FJ195346	B2	not assigned	No	Spain
AY454176	A3	not assigned	No	Switzerland
AY454208	A3	not assigned	No	Switzerland
AY454186	A3	not assigned	No	Switzerland
AY454189	A3	not assigned	No	Switzerland
AY454172	A4	not assigned	No	Switzerland
AY454190	A4	not assigned	No	Switzerland
AY454163	A4	not assigned	No	Switzerland
AY454200	A4	not assigned	No	Switzerland
AY454175	unknown	not assigned	No	Switzerland
AY454218	B2	not assigned	No	Switzerland
a Subgroups 1 and 2 were originally described in Sider et al. [13]. The sequences of subgroup 3 were originally described in Herrmann-Hoesing et al. [29]. Subgroup 4 was characterized in this manuscript.
b Originally described in Sider et al. [13].
